# Supplementary material for: Retrievals of ice microphysical properties using dual-wavelength polarimetric radar observations during stratiform precipitation events
Source: Copernicus journal article supplement (doi:10.5194/amt-15-3969-2022), 2022-07-05
Supplement: Supplementary file 1 [file amt-15-3969-2022-supplement.pdf]

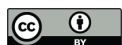

*Supplement of*

## **Retrievals of ice microphysical properties using dual-wavelength polarimetric radar observations during stratiform precipitation events**

**Eleni Tetoni et al.**

*Correspondence to:* Eleni Tetoni ([eleni.tetoni@dlr.de](mailto:eleni.tetoni@dlr.de))

The copyright of individual parts of the supplement might differ from the article licence.

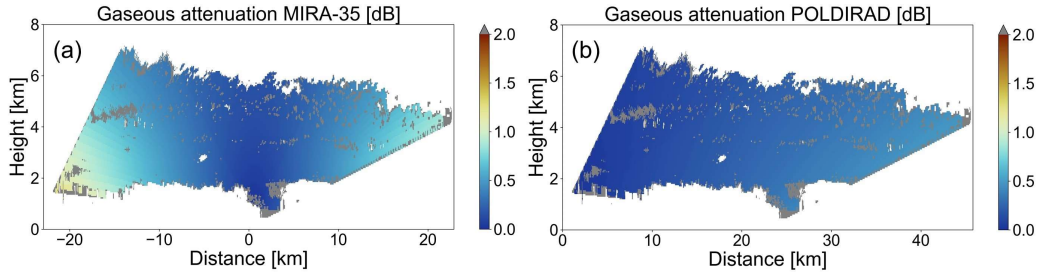

**Figure S1:** Gaseous attenuation estimation for Ka- and C-band for 30<sup>th</sup> January 2019 at 10:08 UTC using line-by-line formulas from ITU-R P.676-12 model (ITU-R P.676-12, 2019). Areas where ice masked and noise-filtered measurement values locate are plotted with grey color.

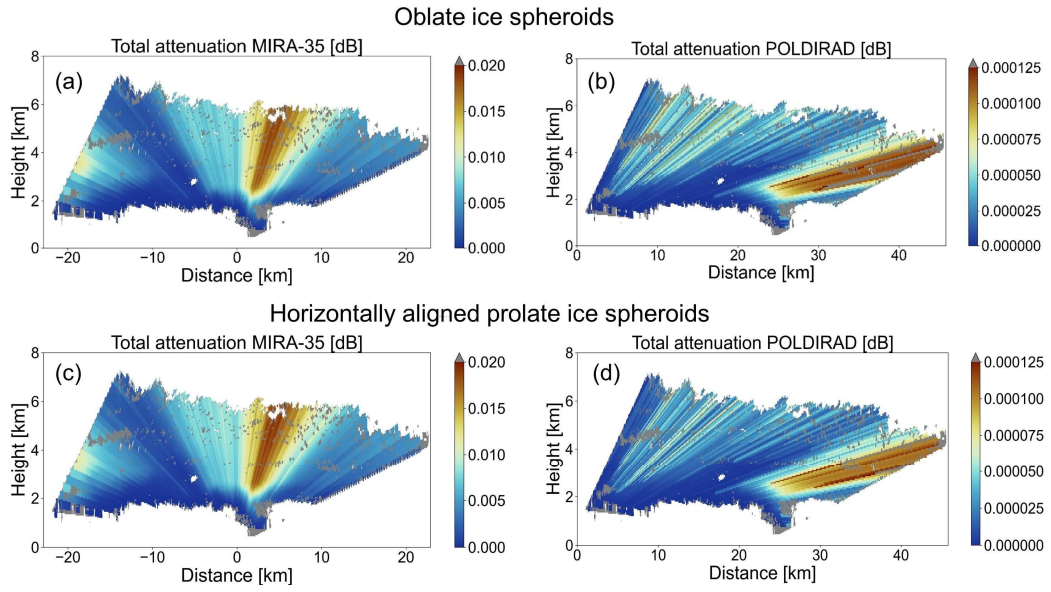

**Figure S2:** Total attenuation estimation for Ka- and C-band for 30<sup>th</sup> January 2019 at 10:08 UTC when (a, b) ice oblates and (c, d) horizontally aligned ice prolates as well as aggregates  $m(D_{\max})$  (Yang et al., 2000) are used for the scattering simulations performed by using PyTMatrix (Leinonen, 2014). Areas where ice masked and noise-filtered measurement values locate are plotted with grey color.

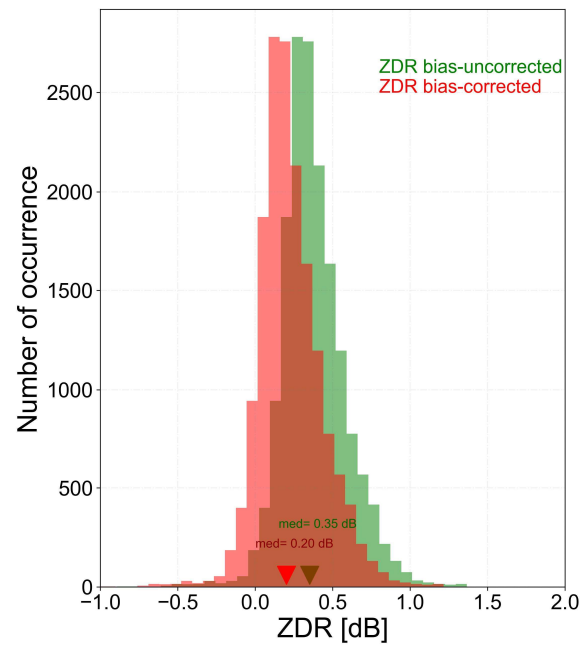

**Figure S3:** ZDR calibration validation for the period of this study following the Ryzhkov and Zrnica (2019) approach for dry aggregates with more relaxed  $Z_e$  ( $Z_e > 20$  dBZ) and temperature ( $-20\text{ }^{\circ}\text{C} < T < -7\text{ }^{\circ}\text{C}$ ) thresholds. With red and green color the histograms for corrected and uncorrected ZDR values, with respect to the ZDR bias as calculated on April 2019, are plotted.

## 25 References

- ITU-R P.676-12: Attenuation by atmospheric gases, available at: <https://www.itu.int/rec/R-REC-P.676/en> (last access: 08 April 2022), August 2019.
- Leinonen, J.: High-level interface to T-matrix scattering calculations: architecture, capabilities and limitations, *Opt. Express*, 22, 1655–1660, <https://doi.org/10.1364/OE.22.001655>, 2014.
- 30 Ryzhkov, A. V. and Zrnica, D. S.: Data Quality and Measurement Errors. In: *Radar Polarimetry for Weather Observations*, Springer, Cham., [https://doi.org/10.1007/978-3-030-05093-1\\_6](https://doi.org/10.1007/978-3-030-05093-1_6), 2019
- Yang, P., Liou, K. N., Wyser, K., and Mitchell, D.: Parameterization of the scattering and absorption properties of individual ice crystals, *J. Geophys. Res.: Atmos.*, 105, 4699–4718, <https://doi.org/10.1029/1999JD900755>, 2000.
